# Supplementary material for: The effects of active rehabilitation on symptoms associated with tau pathology: An umbrella review. Implications for chronic traumatic encephalopathy symptom management
Source: PubMed Central journal article supplement (PMC9302815; doi:10.1371/journal.pone.0271213), 2022-07-21
Supplement: pone.0271213.s002.pdf [file pone.0271213.s002.pdf]

|                               | Measure                  | Review Author              | SMD         | 95% CI      | Lower CI (SMD) | Upper CI (SMD) |
|-------------------------------|--------------------------|----------------------------|-------------|-------------|----------------|----------------|
| <b>Balance</b>                |                          |                            |             |             |                |                |
| Exercise and motor training   | Balance                  | Allen et al.               | 0.33        | 0.22        | 0.11           | 0.55           |
| Exercise vs. no exercise      | Balance                  | Flynn et al.               | 0.21        | 0.11        | 0.10           | 0.32           |
| Dance vs. no intervention     | Balance                  | Sharp et al.               | 0.76        | 0.02        | 0.72           | 0.76           |
| Exercise and motor training   | BBS                      | Allen et al.               | 0.50        | 0.56        | -0.06          | 1.06           |
| Dance vs. no intervention     | BBS                      | Alves da Rocha et al.      | 2.52        | 0.56        | 2.03           | 3.15           |
| Dance vs. no intervention     | BBS                      | Tomlinson et al.           | 0.76        | 0.25        | 0.53           | 1.02           |
| Treadmill vs. no intervention | BBS                      | Tomlinson et al.           | 0.90        | 0.33        | 0.59           | 1.25           |
| Exercise vs. no intervention  | BBS                      | Tomlinson et al.           | 0.44        | 0.38        | 0.06           | 0.81           |
| Yoga vs. no intervention      | BBS                      | Kwok et al.                | 1.22        | 0.98        | 0.25           | 2.20           |
| Meta (Mind body vs no         | BBS                      | Kwok et al.                | 1.48        | 0.58        | 0.91           | 2.06           |
| Tai chi vs. no intervention   | BBS                      | Kwok et al.                | 1.22        | 0.43        | 0.80           | 1.65           |
| Dance vs. no intervention     | BBS                      | Kwok et al.                | 1.94        | 1.77        | 0.18           | 3.71           |
| Tai Chi vs. no intervention   | BBS                      | Yang et al.                | 1.22        | 0.43        | 0.80           | 1.65           |
| Martial arts vs no            | BBS                      | Tomlinson et al.           | 1.42        | 0.46        | 1.01           | 1.93           |
| Exercise and motor training   | SL stand time            | Allen et al.               | 0.12        | 0.27        | -0.15          | 0.38           |
| Tai Chi vs. no intervention   | 1 leg stance             | Yang et al.                | 0.48        | 0.98        | -0.49          | 1.46           |
| Tai Chi vs. no intervention   | Tandem stance            | Yang et al.                | 0.43        | 1.07        | -0.64          | 1.50           |
|                               |                          | <b>Pooled Effect</b>       | <b>0.88</b> | <b>0.33</b> | <b>0.56</b>    | <b>1.21</b>    |
|                               |                          | <b>Prediction interval</b> | <b>0.88</b> | <b>1.27</b> | <b>-0.38</b>   | <b>2.15</b>    |
| <b>Gait Speed/Velocity</b>    |                          |                            |             |             |                |                |
| Exercise and motor training   | Gait velocity/time       | Allen et al.               | 0.27        | 0.18        | 0.09           | 0.44           |
| Dance vs. no intervention     | Gait speed               | Flynn et al.               | 0.30        | 0.19        | 0.12           | 0.49           |
| Dance vs. no intervention     | Gait velocity (forward)  | Delebary et al.            | 0.11        | 0.11        | 0.00           | 0.23           |
| Dance vs. no intervention     | Gait velocity (backward) | Delebary et al.            | 0.20        | 0.23        | -0.02          | 0.43           |
| Tai Chi vs. no intervention   | Velocity                 | Sharp et al.               | 0.42        | 0.38        | 0.04           | 0.80           |
| Exercise vs. no exercise      | Gait velocity            | Yang et al.                | -0.02       | 0.56        | -0.58          | 0.54           |
| General physio vs. no         | Speed                    | Tomlinson et al.           | 0.38        | 0.58        | -0.20          | 0.96           |
| Exercise vs. no intervention  | Speed                    | Tomlinson et al.           | 0.25        | 0.19        | 0.06           | 0.45           |
| Treadmill vs. no intervention | Speed                    | Tomlinson et al.           | 0.29        | 0.16        | 0.13           | 0.45           |
| Dance vs. no intervention     | Speed                    | Tomlinson et al.           | 0.11        | 0.09        | 0.02           | 0.20           |
| Martial arts vs no            | Speed                    | Tomlinson et al.           | -0.52       | -0.28       | -0.26          | -0.81          |
| Dance vs. no intervention     | 6MWT                     | Alves da Rocha et al.      | 1.51        | 0.99        | 0.53           | 2.50           |
| Dance vs. no intervention     | 6MWT                     | Delebary et al.            | 0.39        | 0.37        | 0.01           | 0.76           |
| Dance vs. no intervention     | 6MWT                     | Sharp et al.               | 0.41        | 0.38        | 0.03           | 0.79           |
| Meta (Mind body vs no         | 6MWT                     | Kwok et al.                | -0.78       | 0.43        | -1.21          | -0.35          |
| Tai chi vs. no intervention   | 6MWT                     | Kwok et al.                | -0.82       | 0.61        | -1.43          | -0.22          |
| Dance vs. no intervention     | 6MWT                     | Kwok et al.                | -0.75       | 0.61        | -1.36          | -0.14          |

|                               |                    |                       |       |      |       |       |
|-------------------------------|--------------------|-----------------------|-------|------|-------|-------|
| Tai Chi vs. no intervention   | 6MWT               | Yang et al.           | 0.53  | 0.60 | -0.07 | 1.12  |
|                               |                    | Pooled Effect         | 0.11  | 0.25 | -0.14 | 0.36  |
|                               |                    | Prediction interval   | 0.11  | 1.05 | -0.94 | 1.15  |
| Functional Mobility           |                    |                       |       |      |       |       |
| Dance vs. no intervention     | FoG                | Delebary et al.       | 0.34  | 0.17 | 0.17  | 0.51  |
| Dance vs. no intervention     | FoG                | Sharp et al.          | -0.03 | 0.39 | -0.42 | 0.36  |
| Exercise and motor training   | TUG                | Yang et al.           | 1.06  | 0.38 | 0.68  | 1.44  |
| Exercise and motor training   | TUG                | Allen et al.          | 0.25  | 0.81 | -0.59 | 1.03  |
| Exercise and motor training   | TUG                | Kwok et al.           | 0.97  | 0.50 | 0.48  | 1.47  |
| Exercise and motor training   | TUG                | Kwok et al.           | 0.82  | 0.50 | 0.32  | 1.32  |
| Tai Chi vs. no intervention   | TUG                | Kwok et al.           | 1.18  | 1.88 | -0.70 | 3.07  |
| Tai Chi vs. no intervention   | TUG                | Kwok et al.           | 1.13  | 0.90 | 0.23  | 2.03  |
| Tai Chi vs. no treatment for  | TUG                | Tomlinson et al.      | 0.15  | 1.02 | -0.87 | 1.17  |
| Exercise and motor training   | TUG                | Tomlinson et al.      | 1.12  | 0.41 | 0.72  | 1.53  |
| Meta (Mind body vs no         | TUG                | Tomlinson et al.      | 0.47  | 0.20 | 0.28  | 0.67  |
| Tai chi vs. no intervention   | TUG                | Winser et al.         | -0.76 | 0.53 | -1.29 | -0.23 |
| Dance vs. no intervention     | Turning time       | Allen et al.          | 0.44  | 0.37 | 0.07  | 0.81  |
| Yoga vs. no intervention      | Cadence            | Allen et al.          | 0.16  | 0.57 | -0.75 | 0.40  |
| Exercise vs. no intervention  | Step/stride length | Allen et al.          | 0.31  | 0.20 | 0.12  | 0.51  |
| Martial arts vs no            | Sit to stand       | Allen et al.          | 0.55  | 0.61 | -0.06 | 1.16  |
| Dance vs. no intervention     | Step length        | Yang et al.           | 0.00  | 0.57 | -0.57 | 0.56  |
|                               |                    | Pooled Effect         | 0.45  | 0.26 | 0.19  | 0.71  |
|                               |                    | Prediction interval   | 0.45  | 0.97 | -0.52 | 1.42  |
| Motor Function                |                    |                       |       |      |       |       |
| Tai Chi vs. no intervention   | Motor function     | Yang et al.           | 0.57  | 0.54 | 0.04  | 1.11  |
| Dance vs. no intervention     | UPDRS III          | Alves da Rocha et al. | 4.24  | 3.54 | 0.70  | 7.78  |
| Dance vs. no intervention     | UPDRS III          | Delebary et al.       | 0.66  | 0.14 | 0.52  | 0.80  |
| Meta (Mind body vs no         | UPDRS III          | Kwok et al.           | 0.91  | 0.46 | 0.45  | 1.37  |
| Yoga vs. no intervention      | UPDRS III          | Kwok et al.           | 2.35  | 0.85 | 1.50  | 3.20  |
| Tai chi vs. no intervention   | UPDRS III          | Kwok et al.           | 0.52  | 0.51 | 0.02  | 1.03  |
| Dance vs. no intervention     | UPDRS III          | Kwok et al.           | 1.02  | 0.00 | 0.53  | 0.53  |
| Dance vs. no intervention     | UPDRS III          | Sharp et al.          | 0.90  | 0.55 | 0.35  | 1.45  |
| General phsyio vs. no         | UPDRS III          | Tomlinson et al.      | 0.39  | 0.27 | 0.12  | 0.66  |
| Exercise vs. no intervention  | UPDRS III          | Tomlinson et al.      | 1.05  | 0.48 | 0.32  | 1.28  |
| Treadmill vs. no intervention | UPDRS III          | Tomlinson et al.      | 0.01  | 0.03 | -0.02 | 0.04  |
| Dance vs. no intervention     | UPDRS III          | Tomlinson et al.      | 0.76  | 0.23 | 0.53  | 0.99  |
| Martial arts vs no            | UPDRS III          | Tomlinson et al.      | 0.66  | 0.45 | 0.21  | 1.11  |
|                               |                    | Pooled Effect         | 0.83  | 0.40 | 0.43  | 1.22  |
|                               |                    | Prediction interval   | 0.83  | 1.62 | -0.79 | 2.44  |
| Cognitive Function            |                    |                       |       |      |       |       |

|                          |                  |                            |             |             |              |             |
|--------------------------|------------------|----------------------------|-------------|-------------|--------------|-------------|
| Exercise vs. no exercise | Cognition        | Cai et al.                 | 0.26        | 0.15        | 0.11         | 0.41        |
| Exercise vs. no exercise | Global cognition | Farina et al.              | 1.12        | 0.75        | 0.37         | 1.87        |
| Exercise vs. no exercise | Cognition        | Ströhle et al.             | 0.83        | 0.24        | 0.59         | 1.07        |
|                          |                  | <b>Pooled Effect</b>       | <b>0.66</b> | <b>1.05</b> | <b>-0.40</b> | <b>1.71</b> |
|                          |                  | <b>Prediction interval</b> | <b>0.66</b> | <b>5.66</b> | <b>-5.00</b> | <b>6.32</b> |
