# Supplementary material for: The effects of active rehabilitation on symptoms associated with tau pathology: An umbrella review. Implications for chronic traumatic encephalopathy symptom management
Source: PubMed Central journal article supplement (PMC9302815; doi:10.1371/journal.pone.0271213), 2022-07-21
Supplement: pone.0271213.s003.pdf [file pone.0271213.s003.pdf]

|                                                                                                                                                       | Review question clearly and explicitly stated | Inclusion criteria appropriate for review question                                                           | Search strategy is appropriate | Source & resources used to search are adequate | Criteria for appraising studies are appropriate | Critical appraisal conducted by two or more reviewers independently | Methods to minimize errors in data extraction | Methods used to combine studies are appropriate | Likelihood of publication bias assessed | Recommendations for policy and/or practice supported by data | Specific directives for new research are appropriate |
|-------------------------------------------------------------------------------------------------------------------------------------------------------|-----------------------------------------------|--------------------------------------------------------------------------------------------------------------|--------------------------------|------------------------------------------------|-------------------------------------------------|---------------------------------------------------------------------|-----------------------------------------------|-------------------------------------------------|-----------------------------------------|--------------------------------------------------------------|------------------------------------------------------|
| <a href="https://drive.g">https://drive.g</a> N. E. Allen; C. Sherrington; S. S. Paul; C. P. Alves Da Rocha; J. McClelland; M. E. K. Sharp; J. Hewitt | 2011                                          | Balance and falls in Parkinson's disease: a meta-analysis                                                    | Yes                            | Yes                                            | Yes                                             | Yes                                                                 | Yes                                           | Yes                                             | Yes                                     | Yes                                                          | Yes                                                  |
| <a href="https://drive.g">https://drive.g</a> P. Alves Da Rocha; J. McClelland; M. E. K. Sharp; J. Hewitt                                             | 2015                                          | Complementary physical therapies for movement disorders                                                      | Yes                            | Yes                                            | Yes                                             | Yes                                                                 | Yes                                           | Yes                                             | No                                      | No                                                           | Yes                                                  |
| <a href="https://drive.g">https://drive.g</a> K. Sharp; J. Hewitt                                                                                     | 2014                                          | Dance as an intervention for people with Parkinson's disease                                                 | Yes                            | Yes                                            | Yes                                             | Yes                                                                 | Yes                                           | Yes                                             | Unclear                                 | Unclear                                                      | Yes                                                  |
| <a href="https://drive.g">https://drive.g</a> S. J. Winser; W. W. Tsang; K. Krishnamoorti                                                             | 2018                                          | Does Tai Chi improve balance and reduce falls in Parkinson's disease?                                        | Yes                            | Yes                                            | Yes                                             | Yes                                                                 | Yes                                           | Yes                                             | Unclear                                 | Unclear                                                      | Yes                                                  |
| <a href="https://drive.g">https://drive.g</a> A. Strvöhl; D. K. Schmidt; F. Schultz; H. Cai; G. C. Li; S. S. Hua; Y. F. Liu; L. Ch                    | 2015                                          | Drug and Exercise Treatment of Alzheimer Disease                                                             | Yes                            | Yes                                            | Yes                                             | Yes                                                                 | Yes                                           | Yes                                             | No                                      | No                                                           | Yes                                                  |
| <a href="https://drive.g">https://drive.g</a> H. Cai; G. C. Li; S. S. Hua; Y. F. Liu; L. Ch                                                           | 2017                                          | Effect of exercise on cognitive function in chronic mild traumatic brain injury                              | Yes                            | Yes                                            | Yes                                             | Yes                                                                 | Yes                                           | Yes                                             | No                                      | No                                                           | Yes                                                  |
| <a href="https://drive.g">https://drive.g</a> M. D. Delabary; I. G. Komerowski; E. P. J. Y. Y. Kwok; C. K. Chow; C. H. Y. Lai                         | 2018                                          | Effects of dance practice on functional mobility, balance, and gait in Parkinson's disease                   | Yes                            | Yes                                            | Yes                                             | Yes                                                                 | Yes                                           | Yes                                             | No                                      | No                                                           | Yes                                                  |
| <a href="https://drive.g">https://drive.g</a> J. Y. Y. Kwok; C. K. Chow; C. H. Y. Lai                                                                 | 2016                                          | Effects of mind-body exercises on the physiological and psychological health of Parkinson's disease patients | Yes                            | Yes                                            | Yes                                             | Yes                                                                 | Yes                                           | Yes                                             | No                                      | No                                                           | Yes                                                  |
| <a href="https://drive.g">https://drive.g</a> A. Flynn; N. E. Allen; S. Dennis; C. G. Ca                                                              | 2019                                          | Home-based prescribed exercise improves balance and gait in Parkinson's disease                              | Yes                            | Yes                                            | Yes                                             | Yes                                                                 | Yes                                           | Yes                                             | No                                      | No                                                           | Yes                                                  |
| <a href="https://drive.g">https://drive.g</a> C. L. Tomlinson; S. Patel; C. Meek; C. P                                                                | 2012                                          | Physiotherapy intervention in Parkinson's disease                                                            | Yes                            | Yes                                            | Yes                                             | Yes                                                                 | Yes                                           | Yes                                             | No                                      | No                                                           | Yes                                                  |
| <a href="https://drive.g">https://drive.g</a> Y. Yang; X. Y. Li; L. Gong; Y. L. Zhu; Y. L.                                                            | 2014                                          | Tai Chi for improvement of motor function, balance, and gait in Parkinson's disease                          | Yes                            | Yes                                            | Yes                                             | Yes                                                                 | Yes                                           | Yes                                             | Yes                                     | Yes                                                          | Yes                                                  |
| <a href="https://drive.g">https://drive.g</a> N. Farina; J. Rusted; N. Tabet                                                                          | 2014                                          | The effect of exercise interventions on cognitive function in Parkinson's disease                            | Yes                            | Yes                                            | Yes                                             | Yes                                                                 | Yes                                           | Yes                                             | No                                      | No                                                           | Yes                                                  |
